# Supplementary material
Source: ML conference proceedings conference paper supplement (https://proceedings.mlr.press/v32/rajkumar14.html)
Supplement: Supplementary file 1 [file rajkumar14-supp.pdf]

## Supplementary Material

### Proof of Lemma 3

*Proof.*

*Part 1.* Let  $m \geq \frac{4}{\mu_{\min}}$ . Recall the definitions of  $\widehat{P}_{ij}$ ,  $N_{ij}$ ,  $N_{ij}^{(1)}$  from Eq. (3). In the following, we will make the dependence of these quantities on the training sample explicit; specifically, for any  $\omega \in (\mathcal{X} \times \{0, 1\})^m$ , we will write the corresponding quantities as  $\widehat{P}_{ij}(\omega)$ ,  $N_{ij}(\omega)$ , and  $N_{ij}^{(1)}(\omega)$ , respectively.

Clearly, for any  $\omega, \omega' \in (\mathcal{X} \times \{0, 1\})^m$ , since  $\widehat{P}_{ij}(\omega), \widehat{P}_{ij}(\omega') \in [0, 1]$ , we have

$$|\widehat{P}_{ij}(\omega) - \widehat{P}_{ij}(\omega')| \leq 1.$$

We will prove the result for the case  $i < j$ ; the case  $i > j$  can be proved similarly. Assume  $i < j$ , and let  $B_{ij}$  be the following ‘bad’ event:

$$B_{ij} = \left\{ \omega \in (\mathcal{X} \times \{0, 1\})^m : N_{ij}(\omega) \leq \frac{m\mu_{ij}}{2} \right\}.$$

Then by a straightforward application of Hoeffding’s inequality, we have

$$\mathbf{P}(S \in B_{ij}) \leq \exp(-m\mu_{ij}^2/2) \leq \exp(-m\mu_{\min}^2/2).$$

Now consider  $\omega, \omega' \in (\mathcal{X} \times \{0, 1\})^m$  such that  $\omega \notin B_{ij}$ , and  $\omega, \omega'$  differ only in one element. We can have the following cases:

- (1)  $N_{ij}(\omega') = N_{ij}(\omega)$  and  $N_{ij}^{(1)}(\omega') = N_{ij}^{(1)}(\omega)$
- (2)  $N_{ij}(\omega') = N_{ij}(\omega)$  and  $N_{ij}^{(1)}(\omega') = N_{ij}^{(1)}(\omega) + 1$
- (3)  $N_{ij}(\omega') = N_{ij}(\omega)$  and  $N_{ij}^{(1)}(\omega') = N_{ij}^{(1)}(\omega) - 1$
- (4)  $N_{ij}(\omega') = N_{ij}(\omega) + 1$  and  $N_{ij}^{(1)}(\omega') = N_{ij}^{(1)}(\omega) + 1$
- (5)  $N_{ij}(\omega') = N_{ij}(\omega) + 1$  and  $N_{ij}^{(1)}(\omega') = N_{ij}^{(1)}(\omega)$
- (6)  $N_{ij}(\omega') = N_{ij}(\omega) - 1$  and  $N_{ij}^{(1)}(\omega') = N_{ij}^{(1)}(\omega) - 1$
- (7)  $N_{ij}(\omega') = N_{ij}(\omega) - 1$  and  $N_{ij}^{(1)}(\omega') = N_{ij}^{(1)}(\omega)$

We will consider each of these cases separately, and will show that in each case, the difference  $|\widehat{P}_{ij}(\omega) - \widehat{P}_{ij}(\omega')|$  is upper bounded by  $\frac{2}{m\mu_{\min}}$ .

- Case (1):  $N_{ij}(\omega') = N_{ij}(\omega)$  and  $N_{ij}^{(1)}(\omega') = N_{ij}^{(1)}(\omega)$

In this case nothing changes with respect to the pair  $(i, j)$  and hence

$$|\widehat{P}_{ij}(\omega) - \widehat{P}_{ij}(\omega')| = 0$$

- Case (2):  $N_{ij}(\omega') = N_{ij}(\omega)$  and  $N_{ij}^{(1)}(\omega') = N_{ij}^{(1)}(\omega) + 1$

In this case we have

$$\begin{aligned} |\widehat{P}_{ij}(\omega) - \widehat{P}_{ij}(\omega')| &= \left| \frac{N_{ij}^{(1)}(\omega)}{N_{ij}(\omega)} - \frac{N_{ij}^{(1)}(\omega) + 1}{N_{ij}(\omega)} \right| \\ &= \frac{1}{N_{ij}(\omega)} \\ &\leq \frac{2}{m\mu_{ij}} \leq \frac{2}{m\mu_{\min}} \end{aligned}$$

- Case (3):  $N_{ij}(\omega') = N_{ij}(\omega)$  and  $N_{ij}^{(1)}(\omega') = N_{ij}^{(1)}(\omega) - 1$

In this case we have

$$\begin{aligned} |\widehat{P}_{ij}(\omega) - \widehat{P}_{ij}(\omega')| &= \left| \frac{N_{ij}^{(1)}(\omega)}{N_{ij}(\omega)} - \frac{N_{ij}^{(1)}(\omega) - 1}{N_{ij}(\omega)} \right| \\ &= \frac{1}{N_{ij}(\omega)} \leq \frac{2}{m\mu_{ij}} \leq \frac{2}{m\mu_{\min}} \end{aligned}$$

- Case (4):  $N_{ij}(\omega') = N_{ij}(\omega) + 1$  and  $N_{ij}^{(1)}(\omega') = N_{ij}^{(1)}(\omega) + 1$

In this case we have

$$\begin{aligned} |\widehat{P}_{ij}(\omega) - \widehat{P}_{ij}(\omega')| &= \left| \frac{N_{ij}^{(1)}(\omega)}{N_{ij}(\omega)} - \frac{N_{ij}^{(1)}(\omega) + 1}{N_{ij}(\omega) + 1} \right| \\ &= \left| \frac{N_{ij}(\omega) - N_{ij}^{(1)}(\omega)}{N_{ij}(\omega)(N_{ij}(\omega) + 1)} \right| \leq \left| \frac{N_{ij}(\omega)}{N_{ij}(\omega)(N_{ij}(\omega) + 1)} \right| \\ &\leq \frac{1}{N_{ij}(\omega)} \leq \frac{2}{m\mu_{ij}} \leq \frac{2}{m\mu_{\min}} \end{aligned}$$

- Case (5):  $N_{ij}(\omega') = N_{ij}(\omega) + 1$  and  $N_{ij}^{(1)}(\omega') = N_{ij}^{(1)}(\omega)$

In this case we have

$$\begin{aligned} |\widehat{P}_{ij}(\omega) - \widehat{P}_{ij}(\omega')| &= \left| \frac{N_{ij}^{(1)}(\omega)}{N_{ij}(\omega)} - \frac{N_{ij}^{(1)}(\omega)}{N_{ij}(\omega) + 1} \right| \\ &= \left| \frac{N_{ij}^{(1)}(\omega)}{N_{ij}(\omega)(N_{ij}(\omega) + 1)} \right| \leq \left| \frac{N_{ij}(\omega)}{N_{ij}(\omega)(N_{ij}(\omega) + 1)} \right| \\ &\leq \frac{1}{N_{ij}(\omega)} \leq \frac{2}{m\mu_{ij}} \leq \frac{2}{m\mu_{\min}} \end{aligned}$$

- Case (6):  $N_{ij}(\omega') = N_{ij}(\omega) - 1$  and  $N_{ij}^{(1)}(\omega') = N_{ij}^{(1)}(\omega) - 1$

In this case we have

$$\begin{aligned} |\widehat{P}_{ij}(\omega) - \widehat{P}_{ij}(\omega')| &= \left| \frac{N_{ij}^{(1)}(\omega)}{N_{ij}(\omega)} - \frac{N_{ij}^{(1)}(\omega) - 1}{N_{ij}(\omega) - 1} \right| \\ &= \left| \frac{N_{ij}(\omega) - N_{ij}^{(1)}(\omega)}{N_{ij}(\omega)(N_{ij}(\omega) - 1)} \right| \\ &\leq \frac{1}{N_{ij}(\omega)} \leq \frac{2}{m\mu_{ij}} \leq \frac{2}{m\mu_{\min}} \end{aligned}$$

Note that in this case  $N_{ij}(\omega) - 1$  cannot equal 0 because  $m \geq \frac{4}{\mu_{\min}}$  which guarantees that for  $\omega \notin B_{ij}$ ,  $N_{ij}(\omega) \geq 2$ . Also the final step follows because this case can happen only when  $N_{ij}^{(1)}(\omega) \geq 1$  and so we can upper bound  $\frac{(N_{ij}(\omega) - N_{ij}^{(1)}(\omega))}{(N_{ij}(\omega) - 1)}$  by 1

- Case (7):  $N_{ij}(\omega') = N_{ij}(\omega) - 1$  and  $N_{ij}^{(1)}(\omega') = N_{ij}^{(1)}(\omega)$

In this case we have

$$\begin{aligned} |\widehat{P}_{ij}(\omega) - \widehat{P}_{ij}(\omega')| &= \left| \frac{N_{ij}^{(1)}(\omega)}{N_{ij}(\omega)} - \frac{N_{ij}^{(1)}(\omega)}{N_{ij}(\omega) - 1} \right| \\ &= \left| \frac{N_{ij}^{(1)}(\omega)}{N_{ij}(\omega)(N_{ij}(\omega) - 1)} \right| \\ &\leq \frac{1}{N_{ij}(\omega)} \leq \frac{2}{m\mu_{ij}} \leq \frac{2}{m\mu_{\min}} \end{aligned}$$

Again,  $N_{ij}(\omega) - 1$  cannot equal 0 because  $m \geq \frac{4}{\mu_{\min}}$  which guarantees that for  $\omega \notin B_{ij}$ ,  $N_{ij}(\omega) \geq 2$ . Also note that this case can occur only when  $N_{ij}^{(1)}(\omega) \leq N_{ij}(\omega) - 1$  which is used to upper bound  $\frac{N_{ij}^{(1)}}{N_{ij}(\omega)-1}$  by 1.

Thus we have the required bound in all possible cases.

*Part 2.* This follows directly from Part 1 and Theorem 2.

*Part 3.* Let  $m \geq \frac{1}{\mu_{\min}} \ln\left(\frac{1}{\epsilon}\right)$ . We have,

$$\mathbf{E}[\widehat{P}_{ij}] = P_{ij}(1 - (1 - \mu_{ij})^m).$$

This gives

$$|\mathbf{E}[\widehat{P}_{ij}] - P_{ij}| = P_{ij}(1 - \mu_{ij})^m \leq (1 - \mu_{\min})^m \leq e^{-m\mu_{\min}} \leq \epsilon,$$

where the last inequality follows from the given condition on  $m$ .

*Part 4.* Let  $m$  satisfy the given condition. Then

$$\begin{aligned} \mathbf{P}\left(|\widehat{P}_{ij} - P_{ij}| \geq \epsilon\right) &\leq \mathbf{P}\left(|\widehat{P}_{ij} - \mathbf{E}[\widehat{P}_{ij}]| + |\mathbf{E}[\widehat{P}_{ij}] - P_{ij}| \geq \epsilon\right), \text{ by triangle inequality} \\ &\leq \mathbf{P}\left(|\widehat{P}_{ij} - \mathbf{E}[\widehat{P}_{ij}]| \geq \frac{\epsilon}{2}\right), \text{ by Part 3, since } m \geq \frac{1}{\mu_{\min}} \ln\left(\frac{2}{\epsilon}\right) \\ &\leq 4 \exp\left(\frac{-m\epsilon^2\mu_{\min}^2}{128}\right), \text{ by Part 2.} \end{aligned}$$

*Part 5.* Let  $m \geq \frac{1}{\mu_{\min}P_{\min}} \ln\left(\frac{n(n-1)}{\delta}\right)$ . Then

$$\begin{aligned} \mathbf{P}\left(\exists(i \neq j) : \widehat{P}_{ij} = 0\right) &\leq \sum_{i=1}^n \sum_{j \neq i} \mathbf{P}\left(\widehat{P}_{ij} = 0\right), \text{ by union bound} \\ &= \sum_{i=1}^n \sum_{j \neq i} (1 - \mu_{ij}P_{ij})^m \\ &\leq n(n-1)(1 - \mu_{\min}P_{\min})^m \\ &\leq n(n-1)e^{-m\mu_{\min}P_{\min}} \\ &\leq \delta, \end{aligned}$$

where the last inequality follows from the given condition on  $m$ .

This completes the proof of the lemma. □

**Proof of Lemma 6**

*Proof.* We will first show the forward direction. Assume that the preference matrix  $\mathbf{P}$  satisfies the time-reversibility condition. Let  $\mathbf{Q}$  be the time-reversible Markov chain corresponding to  $\mathbf{P}$ , with stationary distribution  $\pi$ ; since  $\mathbf{Q}$  is irreducible and aperiodic, we have  $\pi_i > 0 \forall i$ . Now let  $i \neq j$ . By time reversibility and definition of  $Q_{ij}$ ,

$$\pi_i P_{ij} = \pi_j P_{ji}.$$

We also have

$$P_{ji} = 1 - P_{ij}.$$

Solving for  $P_{ij}$ , this gives

$$P_{ij} = \frac{\pi_j}{\pi_i + \pi_j}.$$

Thus  $\mathbf{P}$  satisfies the BTL condition with vector  $\mathbf{w} = \pi \in \mathbb{R}_+^n$ . This proves the forward direction.

To show the reverse direction, assume that the preference matrix  $\mathbf{P}$  satisfies the BTL condition with vector  $\mathbf{w} \in \mathbb{R}_+^n$ , so that  $w_i > 0 \forall i$  and  $P_{ij} = \frac{w_j}{w_i + w_j} \forall i \neq j$ . Let  $\mathbf{Q}$  be the Markov chain constructed from  $\mathbf{P}$  as in Eq. (6). Then it is easy to see that the vector  $\pi$  given by  $\pi_i = \frac{w_i}{\sum_{k=1}^n w_k}$  satisfies

$$\pi_i Q_{ij} = \pi_j Q_{ji} \quad \forall i, j \in [n],$$

from which it follows that  $\pi$  is also the stationary probability vector of  $\mathbf{Q}$ . Therefore  $\mathbf{P}$  satisfies the time-reversibility condition, thus proving the reverse direction.  $\square$

**Proof of Theorem 7**

The proof of Theorem 7 builds on techniques of (Negahban et al., 2012). We first state below four lemmas that are used in the proof: two of these are due to Negahban et al. (Negahban et al., 2012); proofs for the remaining two are included below. The statements of the lemmas and corresponding proofs require some additional notation as summarized below:

**Additional notation.** In what follows, for a matrix  $\mathbf{Q} \in \mathbb{R}^{n \times n}$ , we will denote by  $\|\mathbf{Q}\|_F = (\sum_{i=1}^n \sum_{j=1}^n Q_{ij}^2)^{1/2}$  the Frobenius norm of  $\mathbf{Q}$ , by  $\|\mathbf{Q}\|_2 = \max_{\mathbf{x} \in \mathbb{R}^n, \mathbf{x} \neq 0} \frac{\|\mathbf{Q}\mathbf{x}\|_2}{\|\mathbf{x}\|_2}$  the spectral norm of  $\mathbf{Q}$ , and by  $\lambda_{(2)}(\mathbf{Q})$  the second-largest eigenvalue of  $\mathbf{Q}$  in absolute value.

**Lemma 21.** *Let  $(\mu, \mathbf{P})$  be such that  $\mu_{\min} > 0$ . Let  $\mathbf{Q}$  be defined as in Eq. (6). Let  $0 < \epsilon \leq 8$  and  $\delta \in (0, 1]$ . If*

$$m \geq \max \left( \frac{256n}{\epsilon^2 \mu_{\min}^2} \ln \left( \frac{8n^2}{\delta} \right), B(\mu_{\min}) \right),$$

*then with probability at least  $1 - \delta$  (over the random draw of  $S \sim (\mu, \mathbf{P})^m$  from which  $\hat{\mathbf{P}}$  is constructed), the empirical Markov chain  $\hat{\mathbf{Q}}$  constructed by the rank centrality algorithm satisfies*

$$\|\hat{\mathbf{Q}} - \mathbf{Q}\|_2 \leq \epsilon.$$

*Proof of Lemma 21.* Let  $m$  satisfy the given condition. We have,

$$\begin{aligned} \|\mathbf{E}[\hat{\mathbf{Q}}] - \mathbf{Q}\|_F^2 &= \sum_{i=1}^n \sum_{j \neq i} (\mathbf{E}[\hat{Q}_{ij}] - Q_{ij})^2 + \sum_{i=1}^n (\mathbf{E}[\hat{Q}_{ii}] - Q_{ii})^2 \\ &= \sum_{i=1}^n \sum_{j \neq i} \left( \frac{1}{n} (\mathbf{E}[\hat{P}_{ij}] - P_{ij}) \right)^2 + \sum_{i=1}^n \left( \frac{1}{n} \sum_{k \neq i} (\mathbf{E}[\hat{P}_{ik}] - P_{ik}) \right)^2 \\ &\leq \frac{(n-1)}{n} \left( \frac{\epsilon}{2\sqrt{n-1}} \right)^2 + \frac{(n-1)^2}{n} \left( \frac{\epsilon}{2\sqrt{n-1}} \right)^2, \\ &\quad \text{by Lemma 3 (part 3), since } m \geq \frac{256n}{\epsilon^2 \mu_{\min}^2} \ln \left( \frac{8n^2}{\delta} \right) \geq \frac{1}{\mu_{\min}} \ln \left( \frac{2\sqrt{n-1}}{\epsilon} \right) \\ &= (n-1) \left( \frac{\epsilon}{2\sqrt{n-1}} \right)^2 \\ &= \frac{\epsilon^2}{4}. \end{aligned} \tag{10}$$

Now,

$$\begin{aligned}
\mathbf{P}(\|\widehat{\mathbf{Q}} - \mathbf{Q}\|_2 \geq \epsilon) &\leq \mathbf{P}(\|\widehat{\mathbf{Q}} - \mathbf{Q}\|_F \geq \epsilon), \quad \text{since Frobenius norm upper bounds spectral norm} \\
&\leq \mathbf{P}(\|\widehat{\mathbf{Q}} - \mathbf{E}[\widehat{\mathbf{Q}}]\|_F + \|\mathbf{E}[\widehat{\mathbf{Q}}] - \mathbf{Q}\|_F \geq \epsilon), \quad \text{by triangle inequality} \\
&\leq \mathbf{P}\left(\|\widehat{\mathbf{Q}} - \mathbf{E}[\widehat{\mathbf{Q}}]\|_F \geq \frac{\epsilon}{2}\right), \quad \text{by Eq. (10)} \\
&= \mathbf{P}\left(\|\widehat{\mathbf{Q}} - \mathbf{E}[\widehat{\mathbf{Q}}]\|_F^2 \geq \frac{\epsilon^2}{4}\right) \\
&= \mathbf{P}\left(\sum_{i=1}^n \sum_{j \neq i} (\widehat{Q}_{ij} - \mathbf{E}[\widehat{Q}_{ij}])^2 + \sum_{i=1}^n (\widehat{Q}_{ii} - \mathbf{E}[\widehat{Q}_{ii}])^2 \geq \frac{\epsilon^2}{4}\right) \\
&\leq \mathbf{P}\left(\sum_{i=1}^n \sum_{j \neq i} (\widehat{Q}_{ij} - \mathbf{E}[\widehat{Q}_{ij}])^2 \geq \frac{\epsilon^2}{8}\right) + \mathbf{P}\left(\sum_{i=1}^n (\widehat{Q}_{ii} - \mathbf{E}[\widehat{Q}_{ii}])^2 \geq \frac{\epsilon^2}{8}\right) \\
&\leq \sum_{i=1}^n \sum_{j \neq i} \mathbf{P}\left(|\widehat{Q}_{ij} - \mathbf{E}[\widehat{Q}_{ij}]| \geq \frac{\epsilon}{(\sqrt{8}n)}\right) + \sum_{i=1}^n \mathbf{P}\left(|\widehat{Q}_{ii} - \mathbf{E}[\widehat{Q}_{ii}]| \geq \frac{\epsilon}{\sqrt{8n}}\right) \\
&= \sum_{i=1}^n \sum_{j \neq i} \mathbf{P}\left(\frac{1}{n} |\widehat{P}_{ij} - \mathbf{E}[\widehat{P}_{ij}]| \geq \frac{\epsilon}{(\sqrt{8}n)}\right) + \sum_{i=1}^n \mathbf{P}\left(\frac{1}{n} \left| \sum_{k \neq i} (\widehat{P}_{ik} - \mathbf{E}[\widehat{P}_{ik}]) \right| \geq \frac{\epsilon}{\sqrt{8n}}\right) \\
&\leq \sum_{i=1}^n \sum_{j \neq i} \mathbf{P}\left(|\widehat{P}_{ij} - \mathbf{E}[\widehat{P}_{ij}]| \geq \frac{\epsilon}{\sqrt{8}}\right) + \sum_{i=1}^n \mathbf{P}\left(\frac{1}{n} \sum_{k \neq i} |\widehat{P}_{ik} - \mathbf{E}[\widehat{P}_{ik}]| \geq \frac{\epsilon}{\sqrt{8n}}\right) \\
&\leq \sum_{i=1}^n \sum_{j \neq i} \mathbf{P}\left(|\widehat{P}_{ij} - \mathbf{E}[\widehat{P}_{ij}]| \geq \frac{\epsilon}{\sqrt{8}}\right) + \sum_{i=1}^n \sum_{k \neq i} \mathbf{P}\left(|\widehat{P}_{ik} - \mathbf{E}[\widehat{P}_{ik}]| \geq \frac{\epsilon}{\sqrt{8n}}\right) \\
&\leq 4n^2 \exp\left(\frac{-m\epsilon^2 \mu_{\min}^2}{256}\right) + 4n^2 \exp\left(\frac{-m\epsilon^2 \mu_{\min}^2}{256n}\right), \quad \text{by Lemma 3 (part 2)} \\
&\leq \frac{\delta}{2} + \frac{\delta}{2} = \delta, \quad \text{since } m \geq \frac{256n}{\epsilon^2 \mu_{\min}^2} \ln\left(\frac{8n^2}{\delta}\right).
\end{aligned}$$

This proves the result.  $\square$

**Lemma 22** ((Negahban et al., 2012)). *Let  $\mathbf{Q}$  and  $\widetilde{\mathbf{Q}}$  be time-reversible Markov chains defined on the same transition probability graph  $G = ([n], E)$ , with stationary probability vectors  $\boldsymbol{\pi}$  and  $\widetilde{\boldsymbol{\pi}}$ , respectively. Let  $\alpha = \min_{(i,j) \in E} \frac{\pi_i Q_{ij}}{\widetilde{\pi}_i \widetilde{Q}_{ij}}$  and  $\beta = \max_i \frac{\pi_i}{\widetilde{\pi}_i}$ . Then*

$$1 - \lambda_{(2)}(\mathbf{Q}) \geq \frac{\alpha}{\beta} (1 - \lambda_{(2)}(\widetilde{\mathbf{Q}})).$$

**Lemma 23.** *Let  $\mathbf{Q} \in [0, 1]^{n \times n}$  be the transition probability matrix of a time-reversible Markov chain with  $Q_{ij} > 0 \forall i, j$ , and let  $\boldsymbol{\pi}$  be the stationary probability vector of  $\mathbf{Q}$ . Let  $Q_{\min} = \min_{i,j} Q_{ij}$ ,  $\pi_{\max} = \max_i \pi_i$ , and  $\pi_{\min} = \min_i \pi_i$ . Then the spectral gap of  $\mathbf{Q}$  satisfies*

$$1 - \lambda_{(2)}(\mathbf{Q}) \geq n \left(\frac{\pi_{\min}}{\pi_{\max}}\right) Q_{\min}.$$

*Proof of Lemma 23.* Since  $Q_{ij} > 0 \forall i, j$ , the chain  $\mathbf{Q}$  is defined on the complete directed graph  $G = ([n], [n] \times [n])$ . Define a time-reversible Markov chain  $\widetilde{\mathbf{Q}}$  on the same graph as follows:

$$\widetilde{Q}_{ij} = \frac{1}{n} \quad \forall i, j \in [n].$$

This has stationary probability vector  $\widetilde{\boldsymbol{\pi}}$  given by  $\widetilde{\pi}_i = \frac{1}{n} \forall i$ . Now, using the notation of Lemma 22, we have

$$\begin{aligned}
\alpha &= n^2 \pi_{\min} Q_{\min} \\
\beta &= n \pi_{\max}.
\end{aligned}$$

Moreover,  $\lambda_{(2)}(\tilde{\mathbf{Q}}) = 0$ . By Lemma 22, we therefore have

$$1 - \lambda_{(2)}(\mathbf{Q}) \geq \frac{n^2 \pi_{\min} Q_{\min}}{n \pi_{\max}} = n \left( \frac{\pi_{\min}}{\pi_{\max}} \right) Q_{\min}.$$

□

**Lemma 24** ((Negahban et al., 2012)). *Let  $\mathbf{Q}$  be a time-reversible Markov chain with stationary probability vector  $\boldsymbol{\pi}$ . Let  $\hat{\mathbf{Q}}$  be any other Markov chain, and let  $\mathbf{q}_t$  denote the state distribution of  $\hat{\mathbf{Q}}$  at time  $t$  when started with initial distribution  $\mathbf{q}_0$ . Let  $\pi_{\max} = \max_i \pi_i$ ,  $\pi_{\min} = \min_i \pi_i$ , and  $\rho = \lambda_{(2)}(\mathbf{Q}) + \|\hat{\mathbf{Q}} - \mathbf{Q}\|_2 \sqrt{\frac{\pi_{\max}}{\pi_{\min}}}$ . Then*

$$\frac{\|\mathbf{q}_t - \boldsymbol{\pi}\|_2}{\|\boldsymbol{\pi}\|_2} \leq \rho^t \frac{\|\mathbf{q}_0 - \boldsymbol{\pi}\|_2}{\|\boldsymbol{\pi}\|_2} \sqrt{\frac{\pi_{\max}}{\pi_{\min}}} + \frac{1}{1 - \rho} \|\hat{\mathbf{Q}} - \mathbf{Q}\|_2 \sqrt{\frac{\pi_{\max}}{\pi_{\min}}}.$$

We are now ready to prove Theorem 7:

*Proof of Theorem 7.* Let  $m$  satisfy the given condition. Then by Lemma 21, we have with probability at least  $1 - \frac{\delta}{2}$ , the empirical Markov chain  $\hat{\mathbf{Q}}$  constructed by the rank centrality algorithm satisfies

$$\|\hat{\mathbf{Q}} - \mathbf{Q}\|_2 \leq \frac{\epsilon}{2} \left( \frac{\pi_{\min}}{\pi_{\max}} \right)^{3/2} P_{\min}. \quad (11)$$

In this case, since  $\mathbf{Q}$  is time-reversible with  $Q_{ij} > 0 \forall i, j$  and  $Q_{\min} = \min_{i,j} Q_{ij} = \frac{P_{\min}}{n}$ , by Lemma 23 and Eq. (11), we have

$$\begin{aligned} \rho = \lambda_{(2)}(\mathbf{Q}) + \|\hat{\mathbf{Q}} - \mathbf{Q}\|_2 \sqrt{\frac{\pi_{\max}}{\pi_{\min}}} &\leq 1 - \left( \frac{\pi_{\min}}{\pi_{\max}} \right) P_{\min} + \frac{\epsilon}{2} \left( \frac{\pi_{\min}}{\pi_{\max}} \right) P_{\min} \\ &\leq 1 - \frac{1}{2} \left( \frac{\pi_{\min}}{\pi_{\max}} \right) P_{\min}. \end{aligned} \quad (12)$$

Next, since  $m \geq \frac{1024n}{\epsilon^2 P_{\min}^2 \mu_{\min}^2} \left( \frac{\pi_{\max}}{\pi_{\min}} \right)^3 \ln \left( \frac{16n^2}{\delta} \right) \geq \frac{1}{\mu_{\min} P_{\min}} \ln \left( \frac{2n(n-1)}{\delta} \right)$ , by Lemma 3 (part 5), we have that with probability at least  $1 - \frac{\delta}{2}$ ,  $\hat{P}_{ij} > 0 \forall i \neq j$ , and therefore  $\hat{\mathbf{Q}}$  is an irreducible and aperiodic Markov chain.

Putting the above two statements together, with probability at least  $1 - \delta$ , we have that  $\hat{\mathbf{Q}}$  is an irreducible, aperiodic Markov chain satisfying Eqs. (11-12), and the score vector  $\hat{\boldsymbol{\pi}}$  output by the rank centrality algorithm is the stationary probability vector of  $\hat{\mathbf{Q}}$ . In this case, by Lemma 24, we have that for any initial distribution  $\mathbf{q}_0$  of  $\hat{\mathbf{Q}}$ ,

$$\begin{aligned} \frac{\|\hat{\boldsymbol{\pi}} - \boldsymbol{\pi}\|_2}{\|\boldsymbol{\pi}\|_2} &= \lim_{t \rightarrow \infty} \frac{\|\mathbf{q}_t - \boldsymbol{\pi}\|_2}{\|\boldsymbol{\pi}\|_2} \leq \lim_{t \rightarrow \infty} \rho^t \frac{\|\mathbf{q}_0 - \boldsymbol{\pi}\|_2}{\|\boldsymbol{\pi}\|_2} \sqrt{\frac{\pi_{\max}}{\pi_{\min}}} + \frac{1}{1 - \rho} \|\hat{\mathbf{Q}} - \mathbf{Q}\|_2 \sqrt{\frac{\pi_{\max}}{\pi_{\min}}} \\ &= \frac{1}{1 - \rho} \|\hat{\mathbf{Q}} - \mathbf{Q}\|_2 \sqrt{\frac{\pi_{\max}}{\pi_{\min}}}, \quad \text{since } \rho < 1, \text{ by Eq. (12)} \\ &\leq \epsilon, \quad \text{by Eqs. (11-12)}. \end{aligned}$$

The result follows since  $\|\boldsymbol{\pi}\|_2 \leq 1$ , which gives  $\|\hat{\boldsymbol{\pi}} - \boldsymbol{\pi}\|_2 \leq \frac{\|\hat{\boldsymbol{\pi}} - \boldsymbol{\pi}\|_2}{\|\boldsymbol{\pi}\|_2}$ . □

### Proof of Corollary 8

*Proof.* Let  $\epsilon = \frac{r_{\min}}{3}$ . By definition of  $r_{\min}$ , we have  $r_{\min} \leq 1$ , and therefore  $\epsilon \leq \frac{1}{3} < 1$ . Therefore if  $m$  satisfies the given condition, then by Theorem 7, we have with probability at least  $1 - \delta$ ,

$$\|\hat{\boldsymbol{\pi}} - \boldsymbol{\pi}\|_2 \leq \frac{r_{\min}}{3}.$$

But

$$\begin{aligned}
\|\widehat{\boldsymbol{\pi}} - \boldsymbol{\pi}\|_2 \leq \frac{r_{\min}}{3} &\implies \|\widehat{\boldsymbol{\pi}} - \boldsymbol{\pi}\|_\infty \leq \frac{r_{\min}}{3}, \text{ since } L_2 \text{ norm upper bounds } L_\infty \text{ norm} \\
&\implies |\widehat{\pi}_i - \pi_i| \leq \frac{r_{\min}}{3} \quad \forall i \\
&\implies \left\{ \forall i, j : \pi_j > \pi_i \implies \widehat{\pi}_j > \widehat{\pi}_i \right\}, \text{ by definition of } r_{\min} \\
&\implies \left\{ \forall i, j : P_{ij} > P_{ji} \implies \widehat{\pi}_j > \widehat{\pi}_i \right\}, \text{ by time-reversibility condition on } \mathbf{P} \\
&\implies \text{argsort}(\widehat{\boldsymbol{\pi}}) \subseteq \text{argmin}_{\sigma \in \mathcal{S}_n} \text{er}_{\mu, \mathbf{P}}^{\text{PD}}[\sigma] \\
&\implies \widehat{\sigma} \in \text{argmin}_{\sigma \in \mathcal{S}_n} \text{er}_{\mu, \mathbf{P}}^{\text{PD}}[\sigma].
\end{aligned}$$

Thus we have that with probability at least  $1 - \delta$ ,

$$\widehat{\sigma} \in \text{argmin}_{\sigma \in \mathcal{S}_n} \text{er}_{\mu, \mathbf{P}}^{\text{PD}}[\sigma].$$

This proves the result.  $\square$

### Proof of Lemma 9

*Proof.* Let  $\mathbf{Q}$  be as defined in Eq. (6), and let  $\boldsymbol{\pi}$  be the stationary probability vector of  $\mathbf{Q}$ . From Section 6, we know that  $\mathbf{P}$  satisfies the time-reversibility condition, and therefore any permutation that ranks items according to decreasing order of scores  $\pi_i$  is an optimal permutation w.r.t. the pairwise disagreement error, i.e. we have

$$\text{argsort}(\boldsymbol{\pi}) \subseteq \text{argmin}_{\sigma \in \mathcal{S}_n} \text{er}_{\mu, \mathbf{P}}^{\text{PD}}[\sigma].$$

We will show that  $\text{argsort}(\mathbf{f}^*) = \text{argsort}(\boldsymbol{\pi})$ , which will imply the result. We have,

$$\begin{aligned}
f_i^* &= -\frac{1}{n} \sum_{k=1}^n Y_{ik} = \frac{1}{n} \sum_{k=1}^n \ln \left( \frac{P_{ki}}{P_{ik}} \right) = \frac{1}{n} \ln \left( \prod_{k=1}^n \frac{P_{ki}}{P_{ik}} \right) \\
&= \frac{1}{n} \ln \left( \prod_{k=1}^n \frac{\pi_i}{\pi_k} \right), \text{ by time-reversibility} \\
&= \ln \pi_i - \frac{1}{n} \ln(\pi_1 \cdot \dots \cdot \pi_n).
\end{aligned}$$

The second term on the right-hand side is a constant, and  $\ln(\cdot)$  is a strictly monotonically increasing function; therefore  $\mathbf{f}^*$  induces the same orderings as  $\boldsymbol{\pi}$ , i.e.  $\text{argsort}(\mathbf{f}^*) = \text{argsort}(\boldsymbol{\pi})$ .  $\square$

### Proof of Theorem 10

The proof makes use of the following technical lemma:

**Lemma 25.** *Let  $0 < u, u' < 1$ . Let  $0 < \epsilon < u$ . Then*

$$|u - u'| \leq \epsilon \implies |\ln(u) - \ln(u')| \leq \frac{\epsilon}{u - \epsilon}.$$

*Proof.* Let  $|u - u'| \leq \epsilon$ . Thus  $u' \in (u - \epsilon, u + \epsilon)$ . Now, since  $\ln(\cdot)$  is a concave function, we have

$$\ln(y) \leq \ln(x) + \frac{1}{x}(y - x) \quad \forall x, y > 0.$$

Taking  $x = u$  and  $y = u + \epsilon$  gives

$$\ln(u + \epsilon) \leq \ln(u) + \frac{\epsilon}{u};$$

taking  $x = u - \epsilon$  and  $y = u$  gives

$$\ln(u) \leq \ln(u - \epsilon) + \frac{\epsilon}{u - \epsilon}.$$

Combining both, and using the fact that  $\ln(\cdot)$  is a monotonically increasing function, we get

$$\ln(u) - \frac{\epsilon}{u - \epsilon} \leq \ln(u - \epsilon) \leq \ln(u) \leq \ln(u + \epsilon) \leq \ln(u) + \frac{\epsilon}{u}.$$

For  $\epsilon < u$ , we have  $\frac{\epsilon}{u - \epsilon} > \frac{\epsilon}{u}$ . Thus, since  $u' \in (u - \epsilon, u + \epsilon)$ , we have either

$$\ln(u) - \frac{\epsilon}{u - \epsilon} \leq \ln(u - \epsilon) \leq \ln(u') \leq \ln(u)$$

or

$$\ln(u) \leq \ln(u') \leq \ln(u + \epsilon) \leq \ln(u) + \frac{\epsilon}{u} < \ln(u) + \frac{\epsilon}{u - \epsilon};$$

in both cases, we get  $|\ln(u) - \ln(u')| \leq \frac{\epsilon}{u - \epsilon}$ , thus proving the result. □

*Proof of Theorem 10.* Let  $m$  satisfy the given condition. Since  $m \geq \frac{128}{P_{\min}^2 \mu_{\min}^2} \left(1 + \frac{2}{\epsilon}\right)^2 \ln\left(\frac{16n^2}{\delta}\right) \geq \frac{1}{\mu_{\min} P_{\min}} \ln\left(\frac{2n(n-1)}{\delta}\right)$ , by Lemma 3 (part 5), we have with probability at least  $1 - \frac{\delta}{2}$ ,  $\hat{P}_{ij} > 0 \forall i \neq j$ . In this case, we have

$$\hat{Y}_{ij} = \begin{cases} \ln\left(\frac{\hat{P}_{ij}}{\hat{P}_{ji}}\right) & \text{if } i \neq j \\ 0 & \text{otherwise,} \end{cases}$$

and  $\hat{E} = \mathcal{X}$ . As discussed in (Jiang et al., 2011), the score vector  $\hat{\mathbf{f}}$  output by the least squares algorithm in this case is given by

$$\hat{f}_i = -\frac{1}{n} \sum_{k=1}^n \hat{Y}_{ik} = \frac{1}{n} \sum_{k \neq i} \ln\left(\frac{\hat{P}_{ki}}{\hat{P}_{ik}}\right).$$

Moreover, since  $P_{ij} \in (0, 1) \forall i \neq j$ , we also have

$$f_i^* = -\frac{1}{n} \sum_{k=1}^n Y_{ik} = \frac{1}{n} \sum_{k \neq i} \ln\left(\frac{P_{ki}}{P_{ik}}\right).$$

Next, we have

$$\begin{aligned}
 & \mathbf{P}\left(\exists i : \left| \frac{1}{n} \sum_{k \neq i} \ln \left( \frac{\widehat{P}_{ki}}{\widehat{P}_{ik}} \right) - \frac{1}{n} \sum_{k \neq i} \ln \left( \frac{P_{ki}}{P_{ik}} \right) \right| \geq \epsilon \right) \\
 & \leq \sum_{i=1}^n \mathbf{P}\left( \frac{1}{n} \sum_{k \neq i} \left| \ln \left( \frac{\widehat{P}_{ki}}{\widehat{P}_{ik}} \right) - \ln \left( \frac{P_{ki}}{P_{ik}} \right) \right| \geq \epsilon \right), \quad \text{by union bound and triangle inequality} \\
 & \leq \sum_{i=1}^n \mathbf{P}\left( \exists k \neq i : \left| \ln \left( \frac{\widehat{P}_{ki}}{\widehat{P}_{ik}} \right) - \ln \left( \frac{P_{ki}}{P_{ik}} \right) \right| \geq \epsilon \right), \\
 & \leq \sum_{i=1}^n \sum_{k \neq i} \mathbf{P}\left( \left| \ln \left( \frac{\widehat{P}_{ki}}{\widehat{P}_{ik}} \right) - \ln \left( \frac{P_{ki}}{P_{ik}} \right) \right| \geq \epsilon \right), \quad \text{by union bound} \\
 & \leq \sum_{i=1}^n \sum_{k \neq i} \mathbf{P}\left( \left| \ln \widehat{P}_{ki} - \ln P_{ki} \right| + \left| \ln \widehat{P}_{ik} - \ln P_{ik} \right| \geq \epsilon \right) \\
 & \leq 2 \sum_{i=1}^n \sum_{k \neq i} \mathbf{P}\left( \left| \ln \widehat{P}_{ki} - \ln P_{ki} \right| \geq \frac{\epsilon}{2} \right) \\
 & \leq 2 \sum_{i=1}^n \sum_{k \neq i} \mathbf{P}\left( \left| \widehat{P}_{ki} - P_{ki} \right| \geq \frac{\epsilon P_{\min}}{2 + \epsilon} \right), \quad \text{by Lemma 25} \\
 & \leq 8n^2 \exp\left( \frac{-m\epsilon^2 P_{\min}^2 \mu_{\min}^2}{128(2 + \epsilon)^2} \right), \quad \text{by Lemma 3 (part 4)} \\
 & \quad \left( \text{since } m \geq \frac{128}{P_{\min}^2 \mu_{\min}^2} \left(1 + \frac{2}{\epsilon}\right)^2 \ln \left( \frac{16n^2}{\delta} \right) \geq \frac{1}{\mu_{\min}} \ln \left( \frac{2(2+\epsilon)}{\epsilon P_{\min}} \right) \right) \\
 & \leq \frac{\delta}{2}, \quad \text{since } m \geq \frac{128}{P_{\min}^2 \mu_{\min}^2} \left(1 + \frac{2}{\epsilon}\right)^2 \ln \left( \frac{16n^2}{\delta} \right).
 \end{aligned}$$

In other words, with probability at least  $1 - \frac{\delta}{2}$ , we have

$$\max_i \left| \frac{1}{n} \sum_{k \neq i} \ln \left( \frac{\widehat{P}_{ki}}{\widehat{P}_{ik}} \right) - \frac{1}{n} \sum_{k \neq i} \ln \left( \frac{P_{ki}}{P_{ik}} \right) \right| \leq \epsilon.$$

Putting the above statements together, we have that with probability at least  $1 - \delta$ ,

$$\|\widehat{\mathbf{f}} - \mathbf{f}^*\|_{\infty} = \max_i |\widehat{f}_i - f_i^*| = \max_i \left| \frac{1}{n} \sum_{k \neq i} \ln \left( \frac{\widehat{P}_{ki}}{\widehat{P}_{ik}} \right) - \frac{1}{n} \sum_{k \neq i} \ln \left( \frac{P_{ki}}{P_{ik}} \right) \right| \leq \epsilon.$$

This proves the result.  $\square$

### Proof of Corollary 11

*Proof.* Let  $\epsilon = \frac{r_{\min}}{3}$ . By definition of  $r_{\min}$ , we have  $r_{\min} \leq n$ , and therefore  $\epsilon \leq \frac{n}{3} \leq (4\sqrt{2})n$ . Therefore if  $m$  satisfies the given condition, then by Theorem 10, we have with probability at least  $1 - \delta$ ,

$$\|\widehat{\mathbf{f}} - \mathbf{f}^*\|_{\infty} \leq \frac{r_{\min}}{3}.$$

But

$$\begin{aligned}
 \|\widehat{\mathbf{f}} - \mathbf{f}^*\|_{\infty} \leq \frac{r_{\min}}{3} & \implies |f_i - f_i^*| \leq \frac{r_{\min}}{3} \quad \forall i \\
 & \implies \left\{ \forall i, j : f_j^* > f_i^* \implies \widehat{f}_j > \widehat{f}_i \right\}, \quad \text{by definition of } r_{\min} \\
 & \implies \left\{ \forall i, j : P_{ij} > P_{ji} \implies \widehat{f}_j > \widehat{f}_i \right\}, \quad \text{by Lemma 9} \\
 & \implies \text{argsort}(\widehat{\mathbf{f}}) \subseteq \text{argmin}_{\sigma \in \mathcal{S}_n} \text{er}_{\mu, \mathbf{P}}^{\text{PD}}[\sigma] \\
 & \implies \widehat{\sigma} \in \text{argmin}_{\sigma \in \mathcal{S}_n} \text{er}_{\mu, \mathbf{P}}^{\text{PD}}[\sigma].
 \end{aligned}$$

Thus we have that with probability at least  $1 - \delta$ ,

$$\hat{\sigma} \in \operatorname{argmin}_{\sigma \in \mathcal{S}_n} \operatorname{er}_{\mu, \mathbf{P}}^{\text{PD}}[\sigma].$$

This proves the result. □

### Proof of Lemma 13

*Proof.* Let  $\mathbf{P} \in [0, 1]^{n \times n}$  satisfy the BTL condition with vector  $\mathbf{w} \in \mathbb{R}_+^n$ , so that  $w_i > 0 \forall i$  and  $P_{ij} = \frac{w_j}{w_i + w_j} \forall i \neq j$ . Then we have

$$\begin{aligned} P_{ij} > P_{ji} &\implies w_j > w_i \\ &\implies \frac{w_j}{w_j + w_k} > \frac{w_i}{w_i + w_k} \quad \forall k \\ &\implies \sum_{k=1}^n \frac{w_j}{w_j + w_k} > \sum_{k=1}^n \frac{w_i}{w_i + w_k} \\ &\implies \sum_{k=1}^n P_{kj} > \sum_{k=1}^n P_{ki}. \end{aligned}$$

Thus  $\mathbf{P}$  satisfies the LN condition. □

### Proof of Theorem 14

*Proof.* Let  $m$  satisfy the given condition. We have,

$$\begin{aligned} \mathbf{P}(\|\hat{\mathbf{f}} - \mathbf{f}^*\|_\infty \geq \epsilon) &= \mathbf{P}(\exists i : |\hat{f}_i - f_i^*| \geq \epsilon) \\ &\leq \sum_{i=1}^n \mathbf{P}(|\hat{f}_i - f_i^*| \geq \epsilon), \quad \text{by union bound} \\ &= \sum_{i=1}^n \mathbf{P}\left(\left|\frac{1}{n} \sum_{k=1}^n (\hat{P}_{ki} - P_{ki})\right| \geq \epsilon\right), \quad \text{by definition of } \hat{f}_i \text{ and } f_i^* \\ &\leq \sum_{i=1}^n \mathbf{P}\left(\frac{1}{n} \sum_{k=1}^n |\hat{P}_{ki} - P_{ki}| \geq \epsilon\right) \\ &\leq \sum_{i=1}^n \mathbf{P}(\exists k : |\hat{P}_{ki} - P_{ki}| \geq \epsilon) \\ &\leq \sum_{i=1}^n \sum_{k=1}^n \mathbf{P}(|\hat{P}_{ki} - P_{ki}| \geq \epsilon), \quad \text{by union bound} \\ &\leq 4n^2 \exp\left(\frac{-m\epsilon^2 \mu_{\min}^2}{128}\right), \quad \text{by Lemma 3 (part 4)} \\ &\quad \left(\text{since } m \geq \frac{128}{\epsilon^2 \mu_{\min}^2} \ln\left(\frac{4n^2}{\delta}\right) \geq \frac{1}{\mu_{\min}} \ln\left(\frac{2n}{\epsilon}\right)\right) \\ &\leq \delta, \quad \text{since } m \geq \frac{128}{\epsilon^2 \mu_{\min}^2} \ln\left(\frac{4n^2}{\delta}\right). \end{aligned}$$

This proves the result. □

### Proof of Corollary 15

*Proof.* Let  $\epsilon = \frac{r_{\min}}{3}$ . By definition of  $r_{\min}$ , we have  $r_{\min} \leq n$ , and therefore  $\epsilon \leq \frac{n}{3} \leq (4\sqrt{2})n$ . Therefore if  $m$  satisfies the given condition, then by Theorem 14, we have with probability at least  $1 - \delta$ ,

$$\|\hat{\mathbf{f}} - \mathbf{f}^*\|_\infty \leq \frac{r_{\min}}{3}.$$

But

$$\begin{aligned}
 \|\widehat{\mathbf{f}} - \mathbf{f}^*\|_\infty \leq \frac{r_{\min}}{3} &\implies |\widehat{f}_i - f_i^*| \leq \frac{r_{\min}}{3} \quad \forall i \\
 &\implies \left\{ \forall i, j : f_j^* > f_i^* \implies \widehat{f}_j > \widehat{f}_i \right\}, \text{ by definition of } r_{\min} \\
 &\implies \left\{ \forall i, j : P_{ij} > P_{ji} \implies \widehat{f}_j > \widehat{f}_i \right\}, \text{ by extended low-noise condition on } \mathbf{P} \\
 &\implies \text{argsort}(\widehat{\mathbf{f}}) \subseteq \text{argmin}_{\sigma \in \mathcal{S}_n} \text{er}_{\mu, \mathbf{P}}^{\text{PD}}[\sigma] \\
 &\implies \widehat{\sigma} \in \text{argmin}_{\sigma \in \mathcal{S}_n} \text{er}_{\mu, \mathbf{P}}^{\text{PD}}[\sigma].
 \end{aligned}$$

Thus we have that with probability at least  $1 - \delta$ ,

$$\widehat{\sigma} \in \text{argmin}_{\sigma \in \mathcal{S}_n} \text{er}_{\mu, \mathbf{P}}^{\text{PD}}[\sigma].$$

This proves the result.  $\square$

### Proof of Theorem 16

*Proof.* We have

$$\widehat{\boldsymbol{\theta}} \in \arg \min_{\boldsymbol{\theta} \in \mathbb{R}^n} \sum_{i < j} \left( \ln(1 + \exp(\theta_j - \theta_i)) - \widehat{P}_{ij}(\theta_j - \theta_i) \right).$$

Setting the gradient of the above objective to  $\mathbf{0}$  gives:

$$\forall i : \sum_{k=1}^n \widehat{P}_{ki} = \sum_{k \neq i} \frac{\exp(\widehat{\theta}_i)}{\exp(\widehat{\theta}_k) + \exp(\widehat{\theta}_i)} = \sum_{k=1}^n P_{ki}^{\widehat{\boldsymbol{\theta}}}, \quad (13)$$

where we denote

$$P_{ij}^{\widehat{\boldsymbol{\theta}}} = \begin{cases} \frac{\exp(\widehat{\theta}_j)}{\exp(\widehat{\theta}_i) + \exp(\widehat{\theta}_j)} & \text{if } i < j \\ 1 - P_{ji}^{\widehat{\boldsymbol{\theta}}} & \text{if } i > j \\ 0 & \text{if } i = j. \end{cases}$$

Now, we have for any  $0 < \epsilon < 4\sqrt{2}$ , if  $m \geq \max(B(\mu_{\min}), \frac{1}{\mu_{\min}} \ln(\frac{2}{\epsilon}))$ , then

$$\begin{aligned}
 \mathbf{P}\left(\exists i : \left| \frac{1}{n} \sum_{k=1}^n (P_{ki} - P_{ki}^{\widehat{\boldsymbol{\theta}}}) \right| \geq \epsilon\right) &= \mathbf{P}\left(\exists i : \left| \frac{1}{n} \sum_{k=1}^n (P_{ki} - \widehat{P}_{ki}) \right| \geq \epsilon\right), \text{ by Eq. (13)} \\
 &\leq \sum_{i=1}^n \mathbf{P}\left(\left| \frac{1}{n} \sum_{k=1}^n (P_{ki} - \widehat{P}_{ki}) \right| \geq \epsilon\right) \\
 &\leq \sum_{i=1}^n \mathbf{P}\left(\frac{1}{n} \sum_{k=1}^n |P_{ki} - \widehat{P}_{ki}| \geq \epsilon\right) \\
 &\leq \sum_{i=1}^n \mathbf{P}\left(\exists k : |P_{ki} - \widehat{P}_{ki}| \geq \epsilon\right) \\
 &\leq \sum_{i=1}^n \sum_{k=1}^n \mathbf{P}(|P_{ki} - \widehat{P}_{ki}| \geq \epsilon) \\
 &\leq 4n^2 \exp\left(\frac{-m\epsilon^2 \mu_{\min}^2}{128}\right), \text{ by Lemma 3 (part 4).}
 \end{aligned}$$

Setting  $\epsilon = \frac{r_{\min}}{3}$ , we get that if  $m$  satisfies the given condition, then with probability at least  $1 - \delta$ ,

$$\left| \frac{1}{n} \sum_{k=1}^n (P_{kj} - P_{kj}^{\widehat{\boldsymbol{\theta}}}) \right| \leq \frac{r_{\min}}{3} \quad \forall j. \quad (14)$$

By definition of  $r_{\min}$ , this means that with probability at least  $1 - \delta$ , we have for all  $i \neq j$ ,

$$\sum_{k=1}^n P_{kj}^{\hat{\theta}} > \sum_{k=1}^n P_{ki}^{\hat{\theta}} \iff \sum_{k=1}^n P_{kj} > \sum_{k=1}^n P_{ki} \iff f_j^* > f_i^*. \quad (15)$$

Also, it is easy to verify that for all  $i \neq j$ ,

$$\hat{w}_j > \hat{w}_i \iff \hat{\theta}_j > \hat{\theta}_i \iff \sum_{k=1}^n P_{kj}^{\hat{\theta}} > \sum_{k=1}^n P_{ki}^{\hat{\theta}} \quad (16)$$

Combining Eqs. (15-16), we have that with probability at least  $1 - \delta$ ,

$$\text{argsort}(\hat{\mathbf{w}}) = \text{argsort}(\mathbf{f}^*).$$

Since  $\text{argsort}(\mathbf{f}^*) \subseteq \text{argmin}_{\sigma \in \mathcal{S}_n} \text{er}_{\mu, \mathbf{P}}^{\text{PD}}[\sigma]$ , we thus have with probability at least  $1 - \delta$ ,

$$\hat{\sigma} \in \text{argmin}_{\sigma \in \mathcal{S}_n} \text{er}_{\mu, \mathbf{P}}^{\text{PD}}[\sigma].$$

This proves the result.  $\square$

### Proof of Proposition 19

*Proof.* Suppose  $\mathbf{P}$  satisfies the GLN condition with vector  $\alpha \in \mathbb{R}^n$ . Then clearly, since  $P_{ij} \neq \frac{1}{2} \forall i \neq j$ , we have  $\forall i < j$ :

$$\begin{aligned} z_{ij} = 1 &\implies P_{ji} > P_{ij} \implies \sum_{k=1}^n \alpha_k P_{ki} > \sum_{k=1}^n \alpha_k P_{kj} \implies \alpha^\top (\mathbf{P}_i - \mathbf{P}_j) > 0 \\ z_{ij} = -1 &\implies P_{ij} > P_{ji} \implies \sum_{k=1}^n \alpha_k P_{kj} > \sum_{k=1}^n \alpha_k P_{ki} \implies \alpha^\top (\mathbf{P}_i - \mathbf{P}_j) < 0. \end{aligned}$$

Thus  $S_{\mathbf{P}}$  is linearly separable by the hyperplane  $\alpha$  passing through the origin.

Conversely, suppose that  $S_{\mathbf{P}}$  is linearly separable by a hyperplane passing through the origin. Then  $\exists \alpha \in \mathbb{R}^n$  s.t.  $z_{ij} \alpha^\top (\mathbf{P}_i - \mathbf{P}_j) > 0 \forall i < j$ . Thus we have  $\forall i < j$ :

$$\begin{aligned} P_{ij} > P_{ji} &\implies z_{ij} = -1 \implies \alpha^\top (\mathbf{P}_i - \mathbf{P}_j) < 0 \implies \sum_{k=1}^n \alpha_k P_{kj} > \sum_{k=1}^n \alpha_k P_{ki} \\ P_{ji} > P_{ij} &\implies z_{ij} = 1 \implies \alpha^\top (\mathbf{P}_i - \mathbf{P}_j) > 0 \implies \sum_{k=1}^n \alpha_k P_{ki} > \sum_{k=1}^n \alpha_k P_{kj}. \end{aligned}$$

Thus  $\mathbf{P}$  satisfies the GLN condition.  $\square$

### Proof of Theorem 20

*Proof.* Let  $m$  satisfy the given conditions. We first show that with probability at least  $1 - \frac{\delta}{2}$ , every label  $\text{sign}(\hat{P}_{ji} - \hat{P}_{ij})$  in  $S_{\hat{\mathbf{P}}}$  is the same as the corresponding label  $\text{sign}(P_{ji} - P_{ij})$  in  $S_{\mathbf{P}}$ . We have,

$$\begin{aligned} \mathbf{P}\left(\exists i \neq j : |\hat{P}_{ij} - P_{ij}| \geq \gamma\right) &\leq \sum_{i \neq j} \mathbf{P}\left(|\hat{P}_{ij} - P_{ij}| \geq \gamma\right), \quad \text{by union bound} \\ &\leq 4n^2 \exp\left(\frac{-m\gamma^2\mu_{\min}^2}{128}\right), \quad \text{by Lemma 3 (part 4)} \\ &\quad \left(\text{since } m \geq \frac{128}{\gamma^2\mu_{\min}^2} \log\left(\frac{8n^2}{\delta}\right) \geq \frac{1}{\mu_{\min}} \ln\left(\frac{2}{\gamma}\right)\right) \\ &\leq \frac{\delta}{2}, \quad \text{since } m \geq \frac{128}{\gamma^2\mu_{\min}^2} \log\left(\frac{8n^2}{\delta}\right). \end{aligned}$$

Thus we have that with probability at least  $1 - \frac{\delta}{2}$ ,

$$|\widehat{P}_{ij} - P_{ij}| \leq \gamma \quad \forall i \neq j.$$

By definition of  $\gamma$ , this yields that with probability at least  $1 - \frac{\delta}{2}$ ,

$$\widehat{P}_{ij} > \widehat{P}_{ji} \iff P_{ij} > P_{ji} \quad \forall i \neq j,$$

i.e. with probability at least  $1 - \frac{\delta}{2}$ ,

$$\text{sign}(\widehat{P}_{ji} - \widehat{P}_{ij}) = \text{sign}(P_{ji} - P_{ij}) \quad \forall i < j.$$

Next, we show that with probability at least  $1 - \frac{\delta}{2}$ , every point  $(\widehat{\mathbf{P}}_i - \widehat{\mathbf{P}}_j)$  in  $S_{\widehat{\mathbf{P}}}$  falls on the same side of the hyperplane given by  $\alpha$  as the corresponding point  $(\mathbf{P}_i - \mathbf{P}_j)$  in  $S_{\mathbf{P}}$ . We have,

$$\begin{aligned} & \mathbf{P}\left(\exists(i < j) : \|(\widehat{\mathbf{P}}_i - \widehat{\mathbf{P}}_j) - (\mathbf{P}_i - \mathbf{P}_j)\|_2 \geq \frac{r_{\min}^\alpha}{2}\right) \\ &= \mathbf{P}\left(\exists(i < j) : \|(\widehat{\mathbf{P}}_i - \mathbf{P}_i) - (\widehat{\mathbf{P}}_j - \mathbf{P}_j)\|_2 \geq \frac{r_{\min}^\alpha}{2}\right) \\ &\leq \sum_{i < j} \mathbf{P}\left(\|(\widehat{\mathbf{P}}_i - \mathbf{P}_i) - (\widehat{\mathbf{P}}_j - \mathbf{P}_j)\|_2 \geq \frac{r_{\min}^\alpha}{2}\right), \quad \text{by union bound} \\ &\leq \sum_{i < j} \left( \mathbf{P}\left(\|\widehat{\mathbf{P}}_i - \mathbf{P}_i\|_2 \geq \frac{r_{\min}^\alpha}{4}\right) + \mathbf{P}\left(\|\widehat{\mathbf{P}}_j - \mathbf{P}_j\|_2 \geq \frac{r_{\min}^\alpha}{4}\right) \right) \\ &\leq \sum_{i < j} \left( \mathbf{P}\left(\exists k : |\widehat{P}_{ki} - P_{ki}| \geq \frac{r_{\min}^\alpha}{4\sqrt{n}}\right) + \mathbf{P}\left(\exists k : |\widehat{P}_{kj} - P_{kj}| \geq \frac{r_{\min}^\alpha}{4\sqrt{n}}\right) \right) \\ &\leq \sum_{i < j} \left( \sum_k \mathbf{P}\left(|\widehat{P}_{ki} - P_{ki}| \geq \frac{r_{\min}^\alpha}{4\sqrt{n}}\right) + \sum_k \mathbf{P}\left(|\widehat{P}_{kj} - P_{kj}| \geq \frac{r_{\min}^\alpha}{4\sqrt{n}}\right) \right) \\ &\leq 8n^3 \exp\left(\frac{-m(r_{\min}^\alpha)^2 \mu_{\min}^2}{2048n}\right), \quad \text{by Lemma 3 (part 4)} \\ &\quad \left(\text{since } m \geq \frac{2048n}{(r_{\min}^\alpha)^2 \mu_{\min}^2} \log\left(\frac{16n^3}{\delta}\right) \geq \frac{1}{\mu_{\min}} \ln\left(\frac{8\sqrt{n}}{r_{\min}^\alpha}\right)\right) \\ &\leq \frac{\delta}{2}, \quad \text{since } m \geq \frac{2048n}{(r_{\min}^\alpha)^2 \mu_{\min}^2} \log\left(\frac{16n^3}{\delta}\right). \end{aligned}$$

Thus with probability at least  $1 - \frac{\delta}{2}$ ,

$$\|(\widehat{\mathbf{P}}_i - \widehat{\mathbf{P}}_j) - (\mathbf{P}_i - \mathbf{P}_j)\|_2 \leq \frac{r_{\min}^\alpha}{2} \quad \forall i < j.$$

By definition,  $r_{\min}^\alpha$  is the smallest Euclidean distance of any point  $(\mathbf{P}_i - \mathbf{P}_j)$  to the hyperplane defined by  $\alpha$ ; therefore we get that with probability at least  $1 - \frac{\delta}{2}$ , all points  $(\widehat{\mathbf{P}}_i - \widehat{\mathbf{P}}_j)$  fall on the same side of the hyperplane  $\alpha$  as the corresponding points  $(\mathbf{P}_i - \mathbf{P}_j)$ .

Combining the above statements yields that with probability at least  $1 - \delta$ , the dataset  $S_{\widehat{\mathbf{P}}}$  is also linearly separable by  $\alpha$ ; in this case, the SVM-RankAggregation algorithm produces a vector  $\widehat{\alpha}$  that correctly classifies all examples in  $S_{\widehat{\mathbf{P}}}$ , i.e. satisfies  $z_{ij} \widehat{\alpha}^\top (\widehat{\mathbf{P}}_i - \widehat{\mathbf{P}}_j) > 0 \quad \forall i < j$  (where  $z_{ij} = \text{sign}(P_{ji} - P_{ij})$ ), and it can be verified that  $\widehat{\alpha}$  must then also satisfy  $z_{ij} \widehat{\alpha}^\top (\mathbf{P}_i - \mathbf{P}_j) > 0 \quad \forall i < j$ , so that  $\text{argsort}(\widehat{\alpha}) \subseteq \text{argmin}_{\sigma \in \mathcal{S}_n} \text{er}_{\mu, \mathbf{P}}^{\text{PD}}[\sigma]$ . This yields that with probability at least  $1 - \delta$ ,

$$\widehat{\sigma} \in \text{argmin}_{\sigma \in \mathcal{S}_n} \text{er}_{\mu, \mathbf{P}}^{\text{PD}}[\sigma].$$

□
